# Supplementary material for: Signaling network analysis of ubiquitin-mediated proteins suggests correlations between the 26S proteasome and tumor progression
Source: Royal Society of Chemistry journal article supplement (doi:10.1039/b905382d), 2009-07-08
Supplement: b905382d-2.pdf [file b905382d-2.pdf]

**Supplementary Table 2: Gene Ontology (GO) enrichment  
analysis of short (S) and medium (M) half-life proteins in  
Motif-subgroups 0 and 1**

| GO Term                                      | P-value  |
|----------------------------------------------|----------|
| regulation of programmed cell death          | 1.01E-06 |
| programmed cell death                        | 1.17E-06 |
| biological regulation                        | 1.36E-06 |
| apoptosis                                    | 1.42E-06 |
| developmental process                        | 1.67E-06 |
| regulation of apoptosis                      | 1.73E-06 |
| positive regulation of cellular process      | 1.75E-06 |
| cell death                                   | 1.89E-06 |
| death                                        | 1.89E-06 |
| positive regulation of biological process    | 2.19E-06 |
| positive regulation of programmed cell death | 2.79E-06 |
| positive regulation of apoptosis             | 2.80E-06 |
| cell development                             | 4.20E-06 |
| induction of programmed cell death           | 5.25E-06 |
| induction of apoptosis                       | 5.38E-06 |
| cell communication                           | 7.74E-06 |
| signal transduction                          | 9.14E-06 |
| apoptotic program                            | 1.21E-05 |
| apoptotic program                            | 1.21E-05 |
| negative regulation of cellular process      | 1.95E-05 |
| cellular developmental process               | 2.40E-05 |
| cell differentiation                         | 2.40E-05 |
| regulation of biological process             | 2.44E-05 |
| negative regulation of biological process    | 3.14E-05 |
| intracellular signaling cascade              | 5.44E-05 |
| regulation of a molecular function           | 6.38E-05 |
| regulation of cellular process               | 1.35E-04 |
| regulation of catalytic activity             | 8.00E-04 |
